# Supplementary material for: Predicting neoadjuvant chemotherapy benefit using deep learning from stromal histology in breast cancer
Source: PubMed Central journal article supplement (PMC9684483; doi:10.1038/s41523-022-00491-1), 2022-11-22
Supplement: 41523_2022_491_MOESM1_ESM.pdf [file 41523_2022_491_MOESM1_ESM.pdf]

## Supplementary Figures and Tables

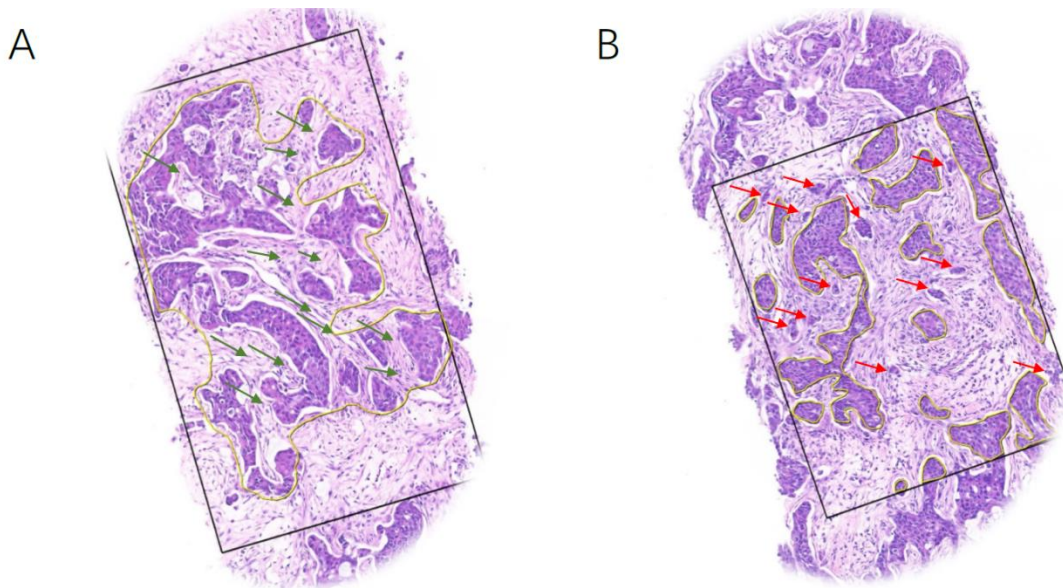

Supplementary Figure 1: Two annotation strategies for tumor epithelium were used to better train the E-S classifier. The black rectangle areas were the representative tumor tissues, and yellow lines circled the regions of tumor epithelium while regions outside the yellow lines were deemed as the stroma. A. An example for rough annotation, green arrows indicated the false annotations, mainly referring the stroma was inside the epithelium annotations. B. An example for precise but partial annotation, red arrows indicated the tumor cells of missed annotations.

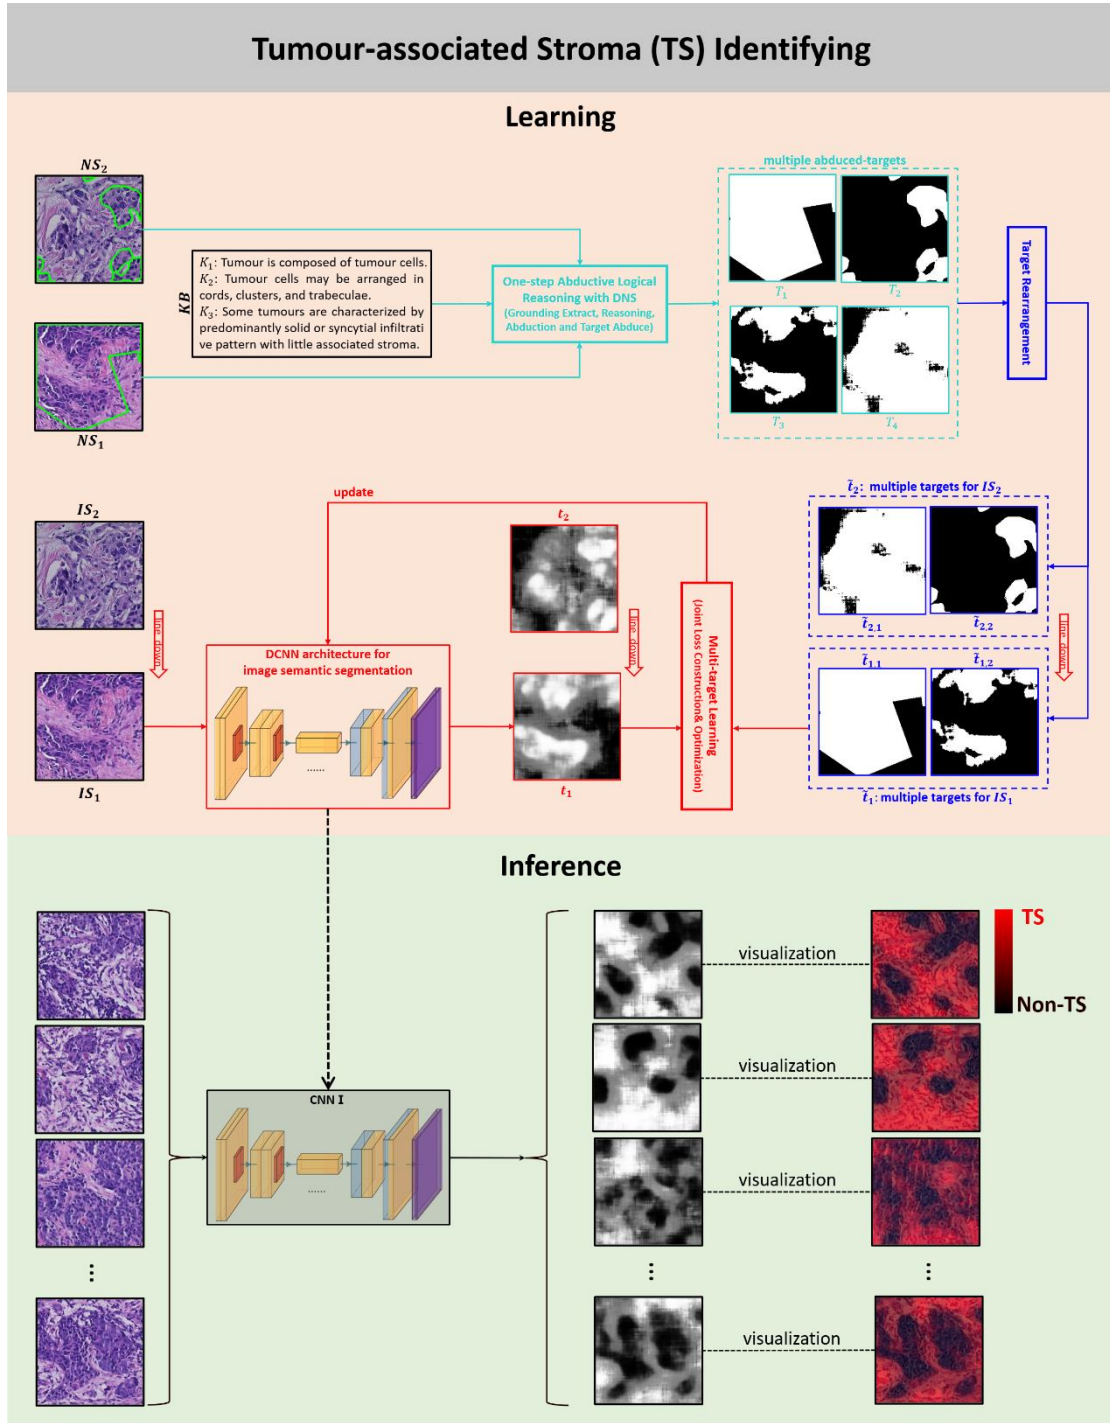

Supplementary Figure 2. The work pipeline of the E-S classifier.

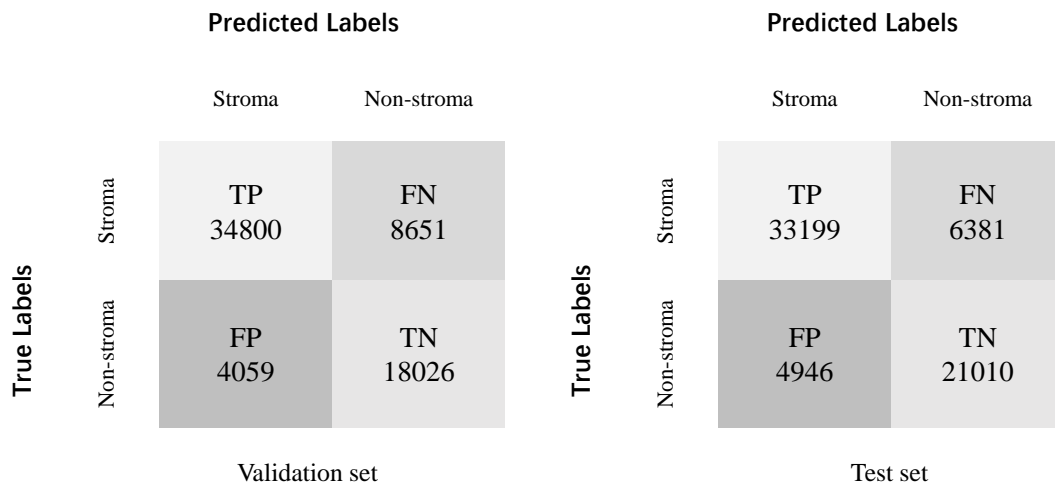

Supplementary Figure 3 Confusion matrix of the E-S classifier for identifying the stroma. The values were referred the amount of pixels.

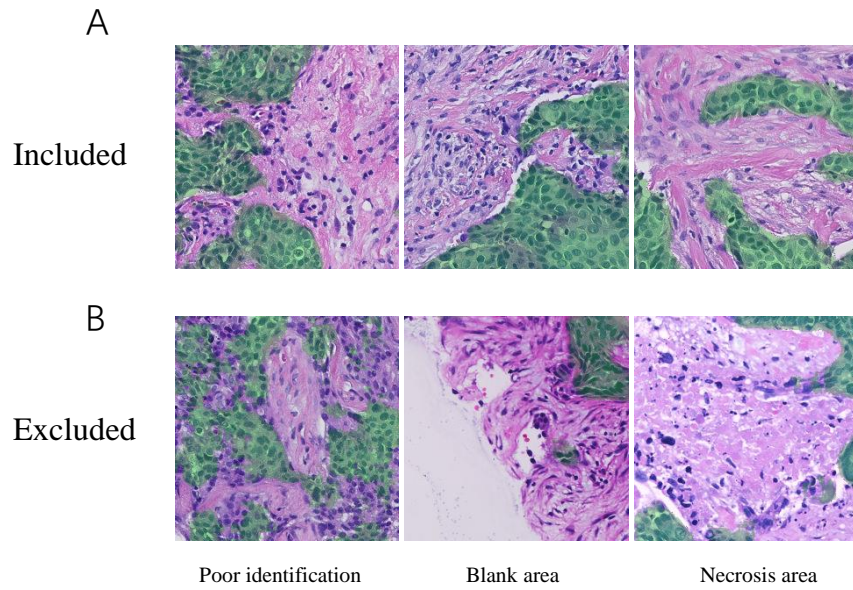

Supplementary Figure 4: Examples of the identified tiles by the E-S classifier, the green regions represent the areas which were identified as tumor while the regions without color mask were identified as stroma. A shows the patches with accurate identification of stroma and these patches were enrolled in our study while B shows the patches with incorrect identification of stroma, lots of blank areas, and necrosis areas and these were removed in this study

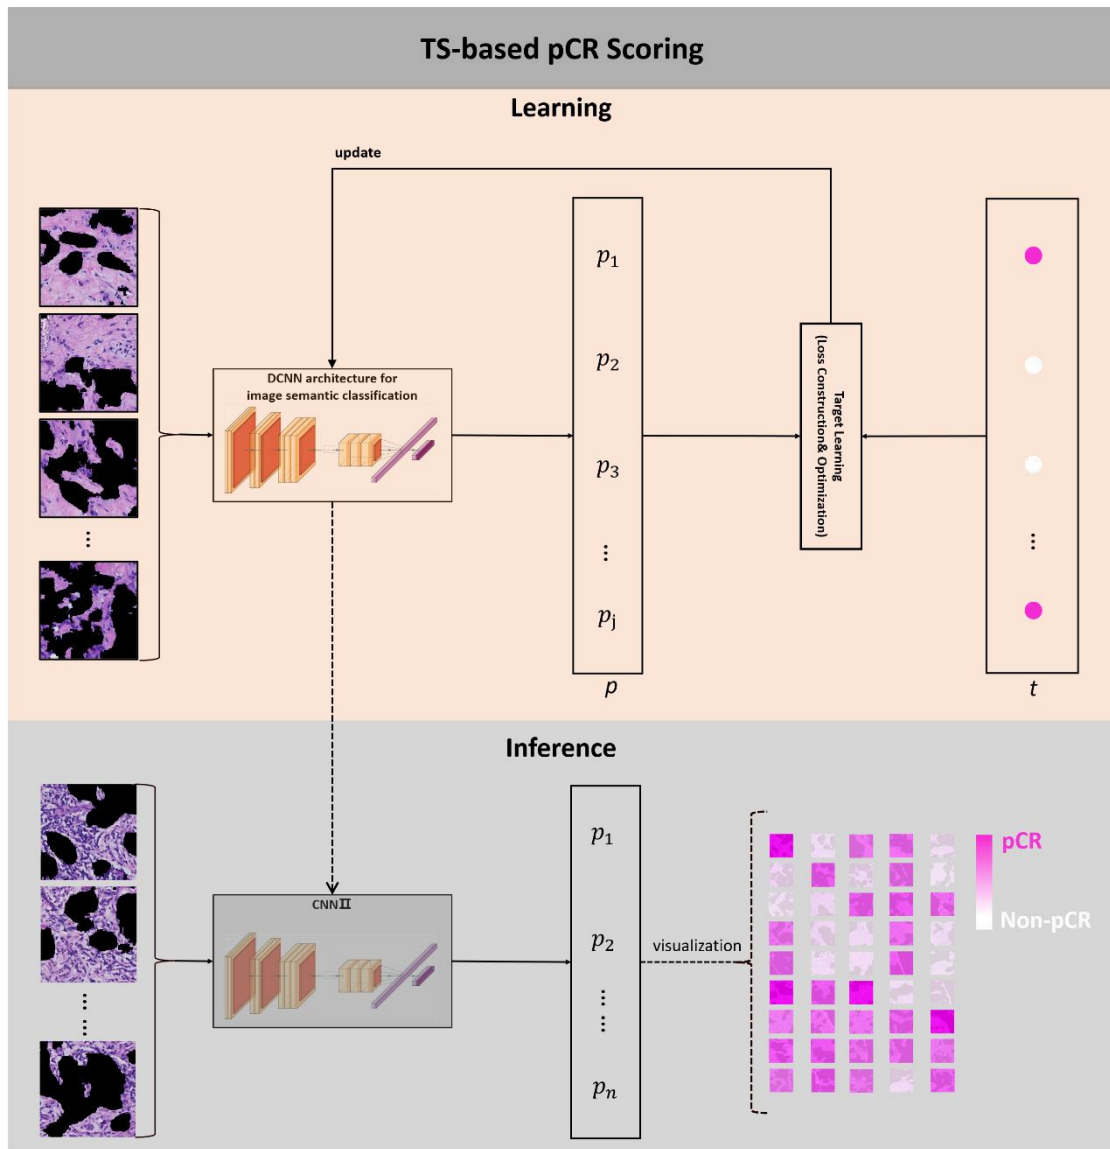

Supplementary Figure 5: The work pipeline of the E-S classifier for generating a TS-score.

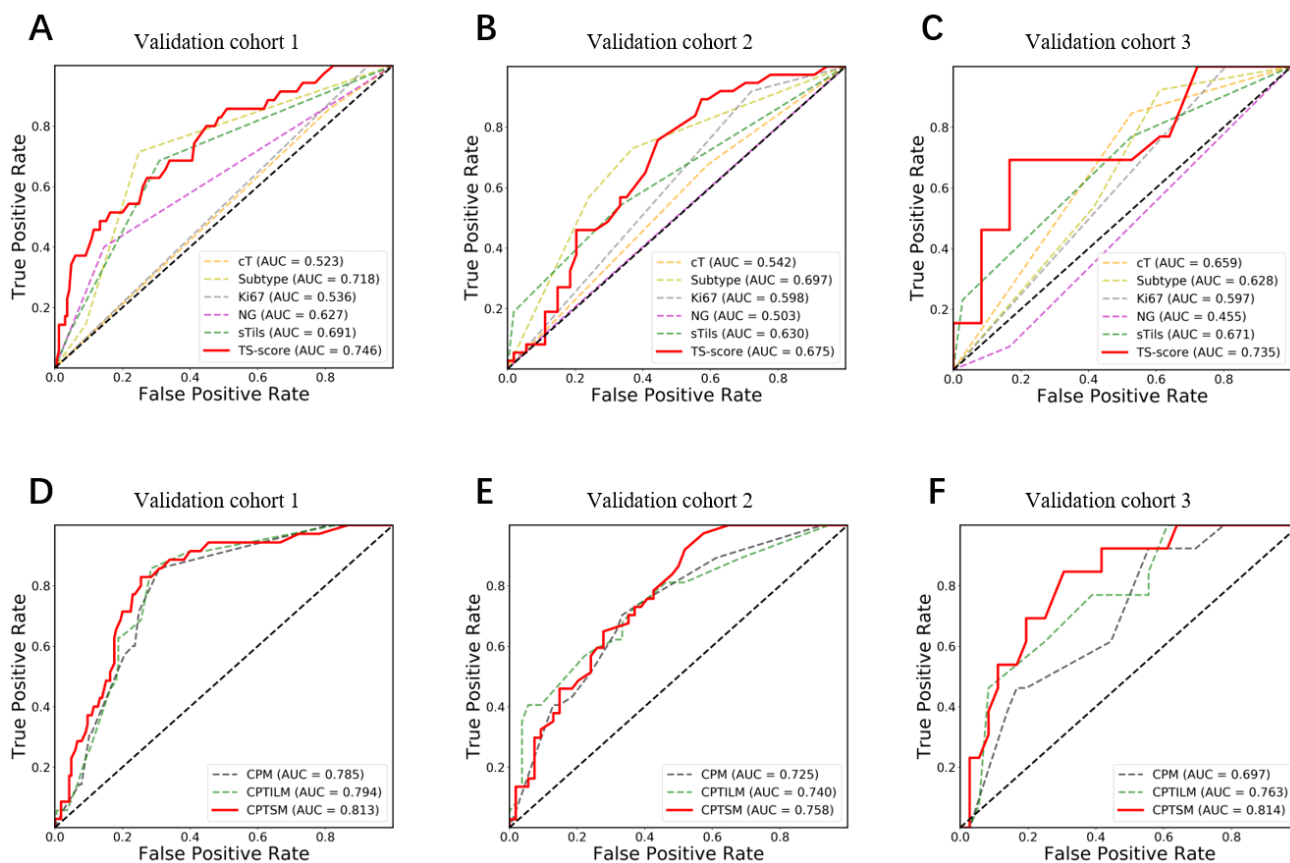

Supplementary Figure 6 ROC curves of the marker-based models. The top row shows the performance of the single marker-based models for predicting pCR in three validations (A, B, C). The bottom row shows the performance of the baseline marker-based model (CPM), the baseline marker and sTILs-based model (CPTILM), and the baseline marker and TS-score-based model (CPTSM) for predicting pCR in three external validations (D, E, F).

**Supplementary Table 1 Inclusion and exclusion notes for patient recruitment**

|   | Inclusion                                                                                                                                                                                                                 | Exclusion                                                                                                                                                                           |
|---|---------------------------------------------------------------------------------------------------------------------------------------------------------------------------------------------------------------------------|-------------------------------------------------------------------------------------------------------------------------------------------------------------------------------------|
| 1 | patients with primary invasive ductal breast cancer                                                                                                                                                                       | patients received a nonstandard treatment regimen, mainly referring to the treatment of HER2+ breast cancers without trastuzumab                                                    |
| 2 | patients without distant metastasis                                                                                                                                                                                       | patients lacking complete clinical and pathological information                                                                                                                     |
| 3 | patients receiving four, six, or eight cycles of anthracycline and/or taxane-based NAC regimens, and patients with human epidermal growth factor receptor 2-positive (HER2+) diseases who underwent targeted HER2 therapy | patients with HE-stained slides of poor quality, including tissue-processing artifacts such as bubbles, discoloration and soiling caused by long storage time and low tissue volume |
| 4 | patients who had undergone surgical treatment after NAC                                                                                                                                                                   | patients diagnosed with bilateral, multifocal, or special invasive breast cancer                                                                                                    |

**Supplementary Table 2 NAC regimens**

| NAC classification  | NAC regimens             | WC<br>(N=695) | SX<br>(N=200) | SC<br>(N=91) | SW<br>(N=49) | Total<br>(N=1035) |
|---------------------|--------------------------|---------------|---------------|--------------|--------------|-------------------|
| Sequential regimens | AC→P/T (+H/HP)           | 17            | 16            | -            | 3            | 175(16.9%)        |
|                     | EC→T/P (+H/HP)           | 124           | 10            | 2            | 3            |                   |
| Combined regimens   | TA/C (+H/HP)             | 9             | 88            | 8            | 7            | 566(54.7%)        |
|                     | TE/C (+H/HP)             | 209           | 33            | 29           | 23           |                   |
|                     | PA/C (+H/HP)             | 21            | 7             | 11           | -            |                   |
| Other regimens      | PEC(+H/HP)               | 113           | 5             | 3            | -            | 294(28.4%)        |
|                     | TC,EC, AC,FEC<br>(+H/HP) | 202           | 41            | 38           | 13           |                   |

*Abbreviations:* NAC, neoadjuvant chemotherapy; WC, West China hospital; SX, Shanxi Cancer hospital; A, doxorubicin; C, cyclophosphamide; P, paclitaxel; T, docetaxel; E, Epirubicin; H, Herceptin; HP, herceptin and pertuzumab.



**Supplementary Table 3 The performance of E-S classifier for identification of stroma.**

| Dataset    | Precision | Recall | F1    | fIOU  | Acc   |
|------------|-----------|--------|-------|-------|-------|
| Validation | 89.55     | 80.09  | 84.46 | 73.25 | 80.60 |
| Test       | 87.03     | 83.88  | 85.43 | 74.56 | 82.71 |

Abbreviations: fIOU, foreground intersection over union; Acc, accuracy

**Supplementary Table 4 Demographic comparisons between pCR and non-pCR groups among primary and validation cohort.**

| Factors     | PC             |                    |                  | V1            |                    |                  | V2            |                   |              | V3            |                   |              |
|-------------|----------------|--------------------|------------------|---------------|--------------------|------------------|---------------|-------------------|--------------|---------------|-------------------|--------------|
|             | pCR<br>(n=169) | Non-pCR<br>(n=526) | <i>P</i>         | pCR<br>(n=35) | Non-pCR<br>(n=165) | <i>P</i>         | pCR<br>(n=37) | Non-pCR<br>(n=54) | <i>P</i>     | pCR<br>(n=13) | Non-pCR<br>(n=36) | <i>P</i>     |
| Age (%)     |                |                    | 0.245            |               |                    | 0.698            |               |                   | 0.277        |               |                   | 0.332        |
| <50         | 91(53.8)       | 311(59.1)          |                  | 11(31.4)      | 60(36.4)           |                  | 18(48.6)      | 19(35.2)          |              | 5(38.5)       | 21(58.3)          |              |
| ≥50         | 78(46.2)       | 215(40.9)          |                  | 24(68.6)      | 105(63.6)          |                  | 19(51.4)      | 35(64.8)          |              | 8(61.5)       | 15(41.7)          |              |
| cT (%)      |                |                    | <b>0.006</b>     |               |                    | 0.634            |               |                   | 0.51         |               |                   | 0.053        |
| T1-T2       | 97(57.4)       | 237(45.1)          |                  | 30(85.7)      | 134(81.2)          |                  | 25(67.6)      | 32(59.3)          |              | 11(84.6)      | 19(52.8)          |              |
| T3-T4       | 72(42.6)       | 289(54.9)          |                  | 5(14.3)       | 31(18.8)           |                  | 12(32.4)      | 22(40.7)          |              | 2(15.4)       | 17(47.2)          |              |
| cN (%)      |                |                    | 0.754            |               |                    | 0.462            |               |                   | 0.243        |               |                   | 0.733        |
| N0          | 13(7.7)        | 45(8.6)            |                  | 8(22.9)       | 27(16.4)           |                  | 8(21.6)       | 19(35.2)          |              | 5(38.5)       | 11(30.6)          |              |
| N1-N3       | 156(92.3)      | 481(91.4)          |                  | 27(77.1)      | 138(83.6)          |                  | 29(78.4)      | 35(64.8)          |              | 8(61.5)       | 25(69.4)          |              |
| HR (%)      |                |                    | <b>&lt;0.001</b> |               |                    | <b>&lt;0.001</b> |               |                   | <b>0.001</b> |               |                   | 0.172        |
| Negative    | 89(52.7)       | 120(22.8)          |                  | 22(62.9)      | 37(22.4)           |                  | 17(45.9)      | 7(13.0)           |              | 7(53.8)       | 10(27.8)          |              |
| Positive    | 80(47.3)       | 406(77.2)          |                  | 13(37.1)      | 128(77.6)          |                  | 20(54.1)      | 47(87.0)          |              | 6(46.2)       | 26(72.2)          |              |
| HER2 (%)    |                |                    | <b>&lt;0.001</b> |               |                    | 0.542            |               |                   | <b>0.002</b> |               |                   | 0.525        |
| Negative    | 68(40.2)       | 411(78.1)          |                  | 30(85.7)      | 149(90.3)          |                  | 16(43.2)      | 41(75.9)          |              | 6(46.2)       | 21(58.3)          |              |
| Positive    | 101(59.8)      | 115(21.9)          |                  | 5(14.3)       | 16(9.7)            |                  | 21(56.8)      | 13(24.1)          |              | 7(53.8)       | 15(41.7)          |              |
| Subtype (%) |                |                    | <b>&lt;0.001</b> |               |                    | <b>&lt;0.001</b> |               |                   | <b>0.002</b> |               |                   | 0.098        |
| HR+/HER2-   | 32(18.9)       | 338(64.3)          |                  | 10(28.6)      | 124(75.2)          |                  | 10(27.0)      | 34(63.0)          |              | 1(7.7)        | 14(38.9)          |              |
| HER2+       | 101(59.8)      | 115(21.9)          |                  | 5(14.3)       | 15(9.1)            |                  | 21(56.8)      | 13(24.1)          |              | 7(53.8)       | 15(41.7)          |              |
| TNBC        | 36(21.3)       | 73(13.9)           |                  | 20(57.1)      | 26(15.8)           |                  | 6(16.2)       | 7(13.0)           |              | 5(38.5)       | 7(19.4)           |              |
| Ki67 (%)    |                |                    | <b>0.002</b>     |               |                    | 0.131            |               |                   | 0.067        |               |                   | 0.167        |
| ≥20%        | 157(92.9)      | 438(83.3)          |                  | 35(100.0)     | 153(92.7)          |                  | 33(89.2)      | 39(72.2)          |              | 13(100.0)     | 29(80.6)          |              |
| <20%        | 12(7.1)        | 88(16.7)           |                  | 0             | 12(7.3)            |                  | 4(10.8)       | 15(27.8)          |              | 0             | 7(19.4)           |              |
| NG(%)       |                |                    | <b>&lt;0.001</b> |               |                    | <b>0.001</b>     |               |                   | 0.318        |               |                   | 0.658        |
| 1月2日        | 91(53.8)       | 395(75.1)          |                  | 21(60.0)      | 141(85.5)          |                  | 32(86.5)      | 47(87.0)          |              | 12(92.3)      | 30(83.3)          |              |
| 3           | 78(46.2)       | 131(24.9)          |                  | 14(40.0)      | 24(14.5)           |                  | 5(13.5)       | 7(13.0)           |              | 1(7.7)        | 6(16.7)           |              |
| sTILs (%)   |                |                    | <b>&lt;0.001</b> |               |                    | <b>&lt;0.001</b> |               |                   | <b>0.011</b> |               |                   | <b>0.045</b> |
| Low         | 60(35.5)       | 337(64.1)          |                  | 11(31.4)      | 114(69.1)          |                  | 17(45.9)      | 36(66.7)          |              | 3(23.1)       | 17(47.2)          |              |
| Moderate    | 82(48.5)       | 169(32.1)          |                  | 20(57.2)      | 44(26.7)           |                  | 13(35.1)      | 17(31.5)          |              | 7(53.8)       | 18(50.0)          |              |
| High        | 27(16.0)       | 20(3.8)            |                  | 4(11.4)       | 7(4.2)             |                  | 7(18.9)       | 1(1.9)            |              | 3(23.1)       | 1(2.8)            |              |

Abbreviations: HR, hormone receptor; HER2, human epidermal growth factor receptor 2; sTILs, stromal tumor-infiltrating lymphocytes; NG, nuclear grade; pCR, pathological complete response.

Bold indicates statistical significance ( $P < 0.05$ )

**Supplementary Table 5. AUCs of TS-score with separation by breast cancer subtypes at WSI-level.**

|          | PC (95% CI)         | V1 (95% CI)         | V2 (95% CI)         | V3 (95% CI)         |
|----------|---------------------|---------------------|---------------------|---------------------|
| HR+HER2- | 0.767 (0.688-0.846) | 0.804 (0.784-0.824) | 0.784 (0.771-0.797) | 1.00 (0.910-1.00)   |
| HER2+    | 0.675 (0.595-0.755) | 0.725 (0.701-0.749) | 0.581 (0.559-0.603) | 0.652 (0.628-0.676) |
| TNBC     | 0.701 (0.647-0.755) | 0.541 (0.525-0.557) | 0.536 (0.501-0.571) | 0.743 (0.705-0.781) |
| Total    | 0.729 (0.714-0.744) | 0.745 (0.737-0.753) | 0.673 (0.662-0.684) | 0.725 (0.708-0.742) |

**Supplementary Table 6. AUCs of TS-score with separation by breast cancer subtypes at patch-level.**

|          | PC (95% CI)         | V1 (95% CI)         | V2 (95% CI)         | V3 (95% CI)         |
|----------|---------------------|---------------------|---------------------|---------------------|
| HR+HER2- | 0.684 (0.610-0.758) | 0.765 (0.753-0.777) | 0.659 (0.651-0.667) | 0.898 (0.818-0.978) |
| HER2+    | 0.610 (0.578-0.642) | 0.700 (0.679-0.721) | 0.477 (0.464-0.490) | 0.648 (0.631-0.665) |
| TNBC     | 0.621 (0.577-0.665) | 0.530 (0.521-0.539) | 0.558 (0.544-0.572) | 0.693 (0.670-0.716) |
| Total    | 0.654 (0.626-0.682) | 0.695 (0.689-0.701) | 0.599 (0.590-0.607) | 0.676 (0.662-0.689) |

**Supplementary Table 7 Univariate and multivariate analysis of TS-score correlating with pCR in the validation cohorts.**

| Factors   | Univariate analysis |                  | Multivariate analysis <sup>1</sup> |                  | Multivariate analysis <sup>2</sup> |                  |
|-----------|---------------------|------------------|------------------------------------|------------------|------------------------------------|------------------|
|           | OR(95% CI)          | P                | OR(95% CI)                         | P                | OR(95% CI)                         | P                |
| TS-score  | -                   | <b>&lt;0.001</b> | -                                  | -                | -                                  | <b>0.013</b>     |
| Subtypes  | -                   | <b>&lt;0.001</b> | -                                  | <b>&lt;0.001</b> | -                                  | <b>&lt;0.001</b> |
| HR+/HER2- | 1                   | -                | 1                                  | -                | 1                                  | -                |
| HER2+     | 6.29(3.31-11.9)     | <b>&lt;0.001</b> | 5.71(2.81-11.6)                    | <b>&lt;0.001</b> | 7.02(3.35-14.7)                    | <b>&lt;0.001</b> |
| TNBC      | 6.35(3.30-12.2)     | <b>&lt;0.001</b> | 5.49(2.70-11.2)                    | <b>&lt;0.001</b> | 5.40(2.64-11.0)                    | <b>&lt;0.001</b> |
| sTILs     | -                   | <b>&lt;0.001</b> | -                                  | <b>0.012</b>     | -                                  | 0.584            |
| Low       | 1                   | -                | 1                                  | -                | 1                                  | -                |
| Moderate  | 2.73(1.59-4.68)     | <b>&lt;0.001</b> | 1.92(1.05-3.53)                    | <b>0.035</b>     | 1.21(0.59-2.47)                    | 0.599            |
| High      | 8.38(3.34-21.0)     | <b>0.002</b>     | 4.34(1.51-12.5)                    | <b>0.007</b>     | 1.92(0.56-6.56)                    | 0.300            |
| cT        | 1.31(0.74-2.35)     | 0.355            | 0.65(0.33-1.27)                    | 0.206            | 0.72(0.37-1.42)                    | 0.343            |
| Ki67      | 4.02(1.20-13.5)     | <b>0.024</b>     | 2.35(0.63-8.77)                    | 0.204            | 2.15(0.56-8.32)                    | 0.268            |
| NG        | 1.81(0.98-3.34)     | 0.056            | 1.03(0.49-2.16)                    | 0.930            | 0.96(0.45-2.04)                    | 0.915            |

*Note:* Multivariate analysis <sup>1</sup> refers to the multivariate analysis excluding BCSS; Multivariate analysis <sup>2</sup> refers to the multivariate analysis including the BCSS.

*Abbreviation:* HR, hormone receptor; HER2, human epidermal growth factor receptor 2; sTILs, stromal tumor-infiltrating lymphocytes; NG, nuclear grade

Bold indicates statistical significance ( $P < 0.05$ )

**Supplementary Table 8. AUCs of single marker-based model for pCR prediction in primary and validation cohorts**

| Model    | PC (95% CI)         | <i>P</i>         | VCs (95% CI)        | <i>P</i>         | V1 (95% CI)         | <i>P</i>         | V2 (95% CI)         | <i>P</i> | V3 (95% CI)         | <i>P</i>     |
|----------|---------------------|------------------|---------------------|------------------|---------------------|------------------|---------------------|----------|---------------------|--------------|
| TS-score | 0.727 (0.711-0.743) | 1                | 0.681 (0.675-0.687) | 1                | 0.746 (0.736-0.756) | 1                | 0.675 (0.664-0.686) | 1        | 0.735 (0.717-0.753) | 1            |
| sTILs    | 0.651 (0.611-0.691) | <b>&lt;0.001</b> | 0.622 (0.616-0.628) | 0.517            | 0.691 (0.682-0.700) | <b>0.036</b>     | 0.630 (0.619-0.641) | 0.420    | 0.671 (0.654-0.688) | 0.419        |
| Subtype  | 0.727 (0.689-0.765) | 0.927            | 0.713 (0.708-0.718) | 0.490            | 0.718 (0.709-0.727) | 0.631            | 0.697 (0.686-0.708) | 0.759    | 0.628 (0.614-0.642) | 0.408        |
| cT       | 0.546 (0.513-0.579) | <b>&lt;0.001</b> | 0.525 (0.519-0.531) | <b>&lt;0.001</b> | 0.523 (0.516-0.530) | <b>&lt;0.001</b> | 0.542 (0.531-0.551) | 0.081    | 0.659 (0.645-0.673) | 0.434        |
| Ki67     | 0.547 (0.532-0.562) | <b>&lt;0.001</b> | 0.549 (0.546-0.552) | <b>&lt;0.001</b> | 0.536 (0.534-0.538) | <b>&lt;0.001</b> | 0.598 (0.590-0.606) | 0.252    | 0.597 (0.590-0.604) | 0.111        |
| NG       | 0.592 (0.566-0.622) | <b>&lt;0.001</b> | 0.545 (0.540-0.550) | <b>&lt;0.001</b> | 0.627 (0.617-0.637) | <b>0.032</b>     | 0.503 (0.496-0.510) | 0.007    | 0.455 (0.445-0.465) | <b>0.002</b> |

*Abbreviations:* AUC, area under receiver operating characteristic curve; *pCR*, pathological complete response;

p value refers to Delong test for the differences of AUCs between different metrics

\*  $p < 0.05$ , with significant or marginally significant differences for AUCs of ... compared with that of TS-score

**Supplementary Table 9. AUCs of models for pCR prediction in the primary and validation cohorts**

|                      | CPTSM (95% CI)      | CPTILM (95% CI)     | CPM (95% CI)        |
|----------------------|---------------------|---------------------|---------------------|
| V1                   | 0.813 (0.806-0.820) | 0.794 (0.788-0.800) | 0.785 (0.778-0.792) |
| p value <sup>1</sup> | 0.265               | 0.661               | 1                   |
| p value <sup>2</sup> | 0.199               | 1                   | -                   |
| V2                   | 0.758 (0.749-0.767) | 0.740 (0.728-0.751) | 0.725 (0.714-0.736) |
| p value <sup>1</sup> | 0.204               | 0.237               | 1                   |
| p value <sup>2</sup> | 0.614               | 1                   | -                   |
| V3                   | 0.814 (0.801-0.827) | 0.763 (0.749-0.777) | 0.697 (0.682-0.712) |
| p value <sup>1</sup> | 0.139               | 0.235               | 1                   |
| p value <sup>2</sup> | 0.313               | 1                   | -                   |

*Abbreviations:* AUC, area under receiver operating characteristic curve; pCR, pathological complete response; CPM, clinicopathology-based model; CPTILM, clinicopathology and sTILs based model; CPTSM, clinicopathology and TS-score based model.

p value refers to Delong test for the differences of AUCs between different metrics in different cohorts; p value<sup>1</sup> refers the comparisons with the CPM while p value<sup>2</sup> refers the comparisons with CPTILM.

Bold indicates statistical significance ( $P < 0.05$ )

**Supplementary Table 10 The distributions of stromal histological patterns in pCR and non-pCR groups**

| Group    | C           | F           | L           | U         | Sum   |
|----------|-------------|-------------|-------------|-----------|-------|
| pCR      | 47 (18.5%)  | 72 (28.3%)  | 112 (44.1%) | 23 (9.1%) | 254   |
| Non-pCR  | 284 (36.4%) | 278 (35.6%) | 154 (19.7%) | 65 (8.3%) | 781   |
| Total    | 331 (32.0%) | 350 (33.8%) | 266 (25.7%) | 88 (8.5%) | 1035  |
| pCR rate | 14.2%       | 20.6%       | 42.1%       | 26.1%     | 24.5% |
